# Supplementary material
Source: ML conference proceedings conference paper supplement (https://proceedings.mlr.press/v164/liu22b.html)
Supplement: Supplementary file 1 [file liu22b-supp.zip]

Archive with 1 entries (1 files):
- CoRL_Supplementary/MoPA-PD-Supplementary.pdf
